# Supplementary material
Source: MDPI journal article supplement (https://www.mdpi.com/2078-1547/13/2/57)
Supplement: s1 [file s1]

## Supplemental Materials

**Table S1. Analysis of open-ended question, “Please describe sources of information on health impacts from climate change that you already rely on or that you would recommend to other healthcare providers” N=510**

| Category                                                                                                                                                                                         | Frequency | Percentage |
|--------------------------------------------------------------------------------------------------------------------------------------------------------------------------------------------------|-----------|------------|
| Scientific research or journal articles                                                                                                                                                          | 109       | 21.4       |
| News articles or media (New York Times, CNN, NPR)                                                                                                                                                | 98        | 19.2       |
| Internet or webpage                                                                                                                                                                              | 61        | 12.0       |
| Professional organizations or other organizations (Alliance of Nurses for Healthy Environments, American Lung Association, American Heart Association, American Public Health Association, etc.) | 58        | 11.4       |
| Centers for Disease Control and Prevention                                                                                                                                                       | 49        | 9.6        |
| Minnesota Department of Health                                                                                                                                                                   | 31        | 6.1        |
| World Health Organization                                                                                                                                                                        | 14        | 2.7        |
| National Institute of Health                                                                                                                                                                     | 7         | 1.4        |
| Continuing education                                                                                                                                                                             | 6         | 1.2        |
| Documentaries or podcasts                                                                                                                                                                        | 5         | 1.0        |
| I don’t have any or I don’t know of any resources                                                                                                                                                | 27        | 5.3        |

**Table S2. Analysis of open-ended question, "Please provide one or more examples of conversations you have had with patients related to climate change and health." N=929**

| Category                         | Subcategory | Frequency | Percentage |
|----------------------------------|-------------|-----------|------------|
| Impacts on respiratory health    |             | 355       | 38.2       |
|                                  | Allergies   | 154       | 16.6       |
|                                  | Asthma      | 122       | 13.1       |
|                                  | COPD        | 48        | 5.2        |
|                                  | Mold        | 10        | 1.1        |
| Impacts from temperature changes |             | 276       | 29.7       |

|                                                               |                                                          |     |      |
|---------------------------------------------------------------|----------------------------------------------------------|-----|------|
|                                                               | Heat related                                             | 134 | 14.4 |
|                                                               | Sun/UV                                                   | 53  | 5.7  |
|                                                               | Cold related                                             | 50  | 5.4  |
|                                                               | Warming winters                                          | 17  | 1.8  |
| Air quality/air pollution                                     |                                                          | 112 | 12.1 |
| Mental health impacts                                         |                                                          | 84  | 9.0  |
|                                                               | Seasonal affective disorder                              | 23  | 2.5  |
|                                                               | Mental health impacts directly related to climate change | 12  | 1.3  |
| Extreme weather/natural disasters                             |                                                          | 56  | 6.0  |
|                                                               | Storms                                                   | 15  | 1.6  |
|                                                               | Flooding                                                 | 8   | 0.9  |
|                                                               | Disaster preparedness                                    | 15  | 1.6  |
|                                                               | Wildfires                                                | 30  | 3.2  |
| Impacts on underlying chronic illnesses (non-respiratory)     |                                                          | 46  | 5.0  |
| COVID                                                         |                                                          | 34  | 3.7  |
| General/Other convo about climate change                      |                                                          | 34  | 3.7  |
| Other environmental health issues                             |                                                          | 32  | 3.4  |
| Vectorborne diseases                                          |                                                          | 31  | 3.3  |
| Nutrition/food insecurity                                     |                                                          | 29  | 3.1  |
| Climate change mitigation actions                             |                                                          | 21  | 2.3  |
| Infectious diseases (non vectorborne)                         |                                                          | 13  | 1.4  |
| Economic impacts                                              |                                                          | 11  | 1.2  |
| Healthcare sustainability                                     |                                                          | 2   | 0.2  |
| Have not had conversations with patients about climate change |                                                          | 110 | 11.8 |

**Table S3. Analysis of open-ended question, "What else, if anything, are you doing to address climate change with patients or clients? N=439**

| Category                                                             | Frequency | Percentage |
|----------------------------------------------------------------------|-----------|------------|
| Educating patients about climate change and health                   | 111       | 25.3       |
| Discussing ways patients can protect themselves from health impacts  | 86        | 19.6       |
| Taking/recommending individual actions for climate change mitigation | 62        | 14.1       |
| Educating self and/or colleagues                                     | 32        | 7.3        |
| Advocating for/engaging in climate smart healthcare strategies       | 23        | 5.2        |
| Policy advocacy                                                      | 10        | 2.3        |
| Engaging in/recommending self-care                                   | 2         | 0.5        |
| Nothing                                                              | 137       | 31.2       |

**Table S4. Analysis of open-ended question, "What other thoughts do you have regarding the health impacts from climate change?" N=856**

| Perception of health impacts of climate change                      | Category                                              | Subcategory                                       | Frequency  | Percentage  |
|---------------------------------------------------------------------|-------------------------------------------------------|---------------------------------------------------|------------|-------------|
| <b>Agree/Strongly Agree that climate change is impacting health</b> |                                                       |                                                   | <b>373</b> | <b>43.5</b> |
|                                                                     | Climate change is having real health impacts          |                                                   | 163        | 43.7        |
|                                                                     | Resources and education are needed                    |                                                   | 74         | 19.8        |
|                                                                     |                                                       | Recommendations regarding education/communication | 24         | 6.4         |
|                                                                     | Challenges to talking about/addressing climate change |                                                   | 72         | 19.3        |

|  |                                                                                                                  |                                                                                  |  |    |      |
|--|------------------------------------------------------------------------------------------------------------------|----------------------------------------------------------------------------------|--|----|------|
|  |                                                                                                                  | Lack of time in patient care setting                                             |  | 17 | 4.6  |
|  |                                                                                                                  | Politicization/climate denial                                                    |  | 37 | 9.9  |
|  |                                                                                                                  | Other health/socioeconomic issues take priority                                  |  | 16 | 4.3  |
|  |                                                                                                                  | Lack of support from healthcare leadership                                       |  | 2  | 0.5  |
|  | Recommendations for addressing climate change                                                                    |                                                                                  |  | 59 | 15.8 |
|  |                                                                                                                  | Individual mitigation actions                                                    |  | 11 | 2.9  |
|  |                                                                                                                  | Healthcare sustainability/climate smart healthcare                               |  | 19 | 5.1  |
|  |                                                                                                                  | Recognize socioeconomic factors cause disproportionate impacts (climate justice) |  | 6  | 1.6  |
|  |                                                                                                                  | Support policies addressing climate change                                       |  | 9  | 2.4  |
|  | Health professionals should be involved in addressing health impacts of climate change and/or educating patients |                                                                                  |  | 29 | 7.8  |
|  | New to this topic but inspired to learn more                                                                     |                                                                                  |  | 22 | 5.9  |
|  | This issue is not relevant or appropriate to their practice, patient population, or geographical region          |                                                                                  |  | 11 | 2.9  |
|  | Talking about and/or taking action on climate change may do more harm than good                                  |                                                                                  |  | 5  | 1.3  |
|  | We can't do anything about climate change                                                                        |                                                                                  |  | 3  | 0.8  |

|                                                                      |                                                                                           |  |            |             |
|----------------------------------------------------------------------|-------------------------------------------------------------------------------------------|--|------------|-------------|
| <b>Uncertain/neutral about whether climate change impacts health</b> |                                                                                           |  | <b>100</b> | <b>11.7</b> |
|                                                                      | Need more evidence/information/education                                                  |  | 21         | 21.0        |
|                                                                      | Other health/healthcare problems/health behaviors are more important                      |  | 21         | 21.0        |
|                                                                      | Climate change is a political issue/tactic                                                |  | 16         | 16.0        |
|                                                                      | Not relevant or appropriate to their practice, patient population, or geographical region |  | 14         | 14.0        |
|                                                                      | Climate change is a natural phenomenon (non-anthropogenic)                                |  | 13         | 13.0        |
|                                                                      | Haven't thought much about it or formed an opinion                                        |  | 7          | 7.0         |
|                                                                      | Talking about and/or taking action on climate change may do more harm than good           |  | 6          | 6.0         |
|                                                                      | Recommendations for addressing climate change                                             |  | 6          | 6.0         |
|                                                                      | Unaware/unconvinced that climate change impacts health                                    |  | 5          | 5.0         |
|                                                                      | Other social/environmental issues are more important                                      |  | 5          | 5.0         |
|                                                                      | Recommendations regarding education/communication                                         |  | 3          | 3.0         |
|                                                                      | Climate change isn't happening                                                            |  | 3          | 3.0         |
|                                                                      | Waste of time/resources                                                                   |  | 2          | 2.0         |
|                                                                      | Climate change is God's will                                                              |  | 1          | 1.0         |
| <b>Disagree/Strongly Disagree that climate change impacts health</b> |                                                                                           |  | <b>383</b> | <b>44.7</b> |

|  |                                                                                           |                                     |     |      |
|--|-------------------------------------------------------------------------------------------|-------------------------------------|-----|------|
|  | Climate change is a political issue/tactic                                                |                                     | 118 | 30.8 |
|  | Climate change is a natural phenomenon (non-anthropogenic)                                |                                     | 82  | 21.4 |
|  | Climate change isn't happening                                                            |                                     | 74  | 19.3 |
|  | Other health/healthcare problems/health behaviors are more important                      |                                     | 71  | 18.5 |
|  |                                                                                           | COVID-19 pandemic is more important | 16  | 4.2  |
|  | Climate change doesn't impact health                                                      |                                     | 58  | 15.1 |
|  | Waste of time/resources                                                                   |                                     | 46  | 12.0 |
|  | We don't need to do anything, we will adapt                                               |                                     | 19  | 5.0  |
|  | Other social/environmental issues are more important                                      |                                     | 18  | 4.7  |
|  | Climate change is God's will                                                              |                                     | 12  | 3.1  |
|  | Not relevant or appropriate to their practice, patient population, or geographical region |                                     | 11  | 2.9  |
|  | Hadh't thought about it before/need more evidence to form opinion                         |                                     | 10  | 2.6  |
|  | There is nothing we can do about climate change                                           |                                     | 6   | 1.6  |
|  | Recommendations for communicating/addressing climate change                               |                                     | 6   | 1.6  |
|  | Other countries besides the U.S. are the problem and need to do more                      |                                     | 3   | 0.8  |
